# Supplementary material
Source: PubMed Central journal article supplement (PMC3454505)
Supplement: NIHMS399716-supplement-01.pdf [file NIHMS399716-supplement-01.pdf]

**Figure 1. Chromosomal location of the 273 genes related to epigenetic regulation.**

The DD genes were indicated with green arrow, UU genes with violet arrow on left -hand side, whereas the non-DD UU genes with red arrows on right-hand side. The chromosome regions significantly enriched in genes related to epigenetic regulation, which were identified using positional gene enrichment analysis [9], were indicated with orange boxes.

**Fig.2 Regulatory sequence analysis of epigenetic genes.** Seven well-characterized BRAFV600E signaling transcription factors (TFs), including CREB1, Elk-1, c-Fos, myc, STAT1, STAT2 and PPAR $\gamma$ , were analyzed. Sequences ranging over 3 kbp upstream and 1.5 kbp downstream of the transcription start site of each epigenetic gene were retrieved from Ensembl human genome (GRCh37) ([www.ensembl.org](http://www.ensembl.org)). The regulatory sequence analysis tools (RSAT) [30] was used for scan for the binding motifs of the 7 TFs. The position weight matrix for the transcription factors were extracted from Jaspar vertebrate redundant database (<http://jaspar.cgb.ki.se>). To minimize the false positive rate, threshold on 'p-value' was set to  $5 \times 10^{-5}$  for RSAT analysis. **A)** Average number of TF binding motifs in the 3 groups of epigenetic genes. **B)** The percentage of genes that harbor the TF binding motif in their promoter regions in the 3 groups of epigenetic genes.

**Fig. 3 Randomization test for Pearson's r values.** **A)** Random distribution of the Pearson's r of the expression level of the epigenetic genes to the expression of the 11 potential TSGs in melanoma cells. Since there are totally 20,119 r values (77 per one epigenetic gene) for Pearson correlation analysis of the expression of the 273 epigenetic genes to the expression of the 11 TSGs in the 7 microarray datasets, 77 numerical numbers were randomly picked from 20,119 Pearson's r values, and the median values of the 77 numerical numbers were counted. The procedures were repeated 200,000 times, and a frequency histogram was created by tracking the median values. Red lines represent the 5th and 95th percentiles. The arrows show the median value of the 77 Pearson's r for individual DD and UU genes. The number of times (T) of which the random median values were higher than the actual median number of a DD gene or less than the actual median number of a UU gene were counted, and the p value for an

individual DD or UU gene was calculated using the formula  $(1-T/200000)$ . **B)** Random distribution of the Pearson's r of the expression of the epigenetic genes to the methylation level of the 31 potential TSGs. Similar procedure was used as described in **(A)**, except that in this case we randomly picked 31 numerical numbers from 8,184 r values generated by the Pearson correlation analysis of the expression of the epigenetic genes to the methylation level of the 31 TSGs in melanoma cells.

**Fig. 4 Comparison of Pearson's r values of DD gene expression to TSG expression and r values of DD gene expression to TSG methylation.** Eleven DD genes that showed significantly negative correlation with the TSG expression were included in this analysis. Shown on the left axes are the Pearson's r values of the expression of the DD genes to the methylation level of the TSGs, and shown on the right axes are the r values of the expression of the DD genes to the expression level of the TSGs.

**Table 1. List of 273 epigenetic genes**

| <b>Gene Symbol</b>        | <b>Gene Name</b>                                                    | <b>Reference</b>                               |
|---------------------------|---------------------------------------------------------------------|------------------------------------------------|
| <b>DNA methylaiton</b>    |                                                                     |                                                |
| AICDA                     | activation-induced cytidine deaminase                               | GO:0080111                                     |
| ALKBH1                    | alkB, alkylation repair homolog 1                                   | GO:0080111                                     |
| ALKBH2                    | alkB, alkylation repair homolog 2                                   | GO:0080111                                     |
| APEX1                     | APEX nuclease (multifunctional DNA repair enzyme) 1                 | GO:0080111                                     |
| APOBEC1                   | apolipoprotein B mRNA editing enzyme, catalytic polypeptide 1       | GO:0080111                                     |
| APOBEC2                   | apolipoprotein B mRNA editing enzyme, catalytic polypeptide-like 2  | GO:0080111                                     |
| APOBEC3A                  | apolipoprotein B mRNA editing enzyme, catalytic polypeptide-like 3A | GO:0080111                                     |
| APOBEC3C                  | apolipoprotein B mRNA editing enzyme, catalytic polypeptide-like 3C | GO:0080111                                     |
| APOBEC3F                  | apolipoprotein B mRNA editing enzyme, catalytic polypeptide-like 3F | GO:0080111                                     |
| ATF7IP                    | activating transcription factor 7 interacting protein               | GO:0006306                                     |
| ATRX                      | alpha thalassemia/mental retardation syndrome X-linked              | GO:0006306                                     |
| BAZ2A                     | bromodomain adjacent to zinc finger domain, 2A                      | GO:0006306                                     |
| DMAP1                     | DNA methyltransferase 1 associated protein 1                        | GO:0006306                                     |
| DNMT1                     | DNA (cytosine-5-)-methyltransferase 1                               | GO:0009008, GO:0003886, GO:0006306             |
| DNMT3A                    | DNA (cytosine-5-)-methyltransferase 3 alpha                         | GO:0003886, GO:0051718, GO:0006306             |
| DNMT3B                    | DNA (cytosine-5-)-methyltransferase 3 beta                          | GO:0003886, GO:0051718, GO:0009008, GO:0006306 |
| DNMT3L                    | DNA (cytosine-5-)-methyltransferase 3-like                          | GO:0006306                                     |
| FTO                       | fat mass and obesity associated                                     | GO:0080111                                     |
| GNAS                      | GNAS complex locus                                                  | GO:0006306                                     |
| HEMK1                     | HemK methyltransferase family member 1                              | GO:0006306                                     |
| MGMT                      | O-6-methylguanine-DNA methyltransferase                             | GO:0009008, GO:0006306                         |
| TET1                      | tet methylcytosine dioxygenase 1                                    | GO:0080111                                     |
| TRDMT1                    | tRNA aspartic acid methyltransferase 1                              | GO:0003886, GO:0006306                         |
| <b>Methyl-CpG binding</b> |                                                                     |                                                |
| LRWD1                     | leucine-rich repeats and WD repeat domain containing 1              | GO:0008327                                     |
| MBD1                      | methyl-CpG binding domain protein 1                                 | GO:0008327                                     |
| MBD2                      | methyl-CpG binding domain protein 2                                 | GO:0008327, GO:0000118                         |
| MBD3                      | methyl-CpG binding domain protein 3                                 | GO:0016581                                     |
| MBD4                      | methyl-CpG binding domain protein 4                                 | [18]                                           |
| MECP2                     | methyl CpG binding protein 2                                        | [18]                                           |
| UHRF1                     | ubiquitin-like with PHD and ring finger domains 1                   | GO:0008327                                     |
| ZBTB33                    | zinc finger and BTB domain containing 33                            | [20]                                           |
| ZNF295                    | zinc finger protein 295                                             | GO:0008327                                     |
| <b>Histone acetyltion</b> |                                                                     |                                                |
| ATF2                      | activating transcription factor 2                                   | [18]                                           |
| BRCA2                     | breast cancer 2, early onset                                        | GO:0010484, GO:0010485                         |
| CDY1                      | chromodomain protein, Y-linked, 1                                   | GO:0004402                                     |
| CDY2B                     | chromodomain protein, Y-linked, 2B                                  | GO:0004402                                     |
| CDYL                      | chromodomain protein, Y-like                                        | GO:0004402                                     |
| CLOCK                     | clock homolog                                                       | GO:0004402                                     |
| CREBBP                    | CREB binding protein                                                | GO:0004402, GO:0000123                         |
| CSRP2BP                   | CSRP2 binding protein                                               | GO:0004402                                     |
| ELP3                      | elongation protein 3 homolog                                        | GO:0004402                                     |

|        |                                                                                  |                                       |
|--------|----------------------------------------------------------------------------------|---------------------------------------|
| ELP4   | elongation protein 4 homolog                                                     | GO:0004402                            |
| EP300  | E1A binding protein p300                                                         | GO:0004402, GO:0000123                |
| EPC1   | enhancer of polycomb homolog 1                                                   | GO:0004402                            |
| GTF3C4 | general transcription factor IIIC, polypeptide 4                                 | GO:0004402                            |
| HAT1   | histone acetyltransferase 1                                                      | GO:0004402                            |
| HCFC1  | host cell factor C1 (VP16-accessory protein)                                     | GO:0000123                            |
| ING3   | inhibitor of growth family, member 3                                             | GO:0004402                            |
| ING4   | inhibitor of growth family, member 4                                             | GO:0000123                            |
| KANSL1 | KAT8 regulatory NSL complex subunit 1                                            | GO:0000123                            |
| KANSL2 | KAT8 regulatory NSL complex subunit 2                                            | GO:0000123                            |
| KANSL3 | KAT8 regulatory NSL complex subunit 3                                            | GO:0000123                            |
| KAT2A  | K(lysine) acetyltransferase 2A                                                   | GO:0004402, GO:0010484,<br>GO:0043997 |
| KAT2B  | K(lysine) acetyltransferase 2B                                                   | GO:0004402, GO:0016585                |
| KAT5   | K(lysine) acetyltransferase 5                                                    | GO:0004402                            |
| KAT6A  | K(lysine) acetyltransferase 6A                                                   | GO:0004402                            |
| KAT6B  | K(lysine) acetyltransferase 6B                                                   | GO:0004402                            |
| KAT7   | K(lysine) acetyltransferase 7                                                    | GO:0004402, GO:0000123                |
| KAT8   | K(lysine) acetyltransferase 8                                                    | GO:0004402, GO:0000123                |
| MED24  | mediator complex subunit 24                                                      | GO:0004402                            |
| METTL8 | methyltransferase like 8                                                         | GO:0004402                            |
| MGEA5  | meningioma expressed antigen 5                                                   | GO:0004402                            |
| NAA60  | N(alpha)-acetyltransferase 60, NatF catalytic subunit                            | GO:0010485                            |
| NCOA1  | nuclear receptor coactivator 1                                                   | GO:0004402                            |
| NCOA2  | nuclear receptor coactivator 2                                                   | GO:0004402                            |
| NCOA3  | nuclear receptor coactivator 3                                                   | GO:0004402                            |
| OGT    | O-linked N-acetylglucosamine (GlcNAc) transferase                                | GO:0000123                            |
| PHF15  | PHD finger protein 15                                                            | GO:0000123                            |
| PHF16  | PHD finger protein 16                                                            | GO:0000123                            |
| PHF17  | PHD finger protein 17                                                            | GO:0000123                            |
| PHF20  | PHD finger protein 20                                                            | GO:0000123                            |
| SAP130 | Sin3A-associated protein, 130kDa                                                 | GO:0004402                            |
| SRCAP  | Snf2-related CREBBP activator protein                                            | GO:0004402                            |
| SUPT3H | suppressor of Ty 3 homolog                                                       | GO:0004402                            |
| SUPT7L | suppressor of Ty 7-like                                                          | GO:0004402                            |
| TADA1  | transcriptional adaptor 1                                                        | GO:0004402                            |
| TADA2A | transcriptional adaptor 2A                                                       | GO:0004402                            |
| TADA3  | transcriptional adaptor 3                                                        | GO:0004402                            |
| TAF1   | TAF1 RNA polymerase II, TATA box binding protein (TBP)-associated factor         | GO:0004402                            |
| TAF10  | TAF10 RNA polymerase II, TATA box binding protein (TBP)-associated factor        | GO:0004402                            |
| TAF12  | TAF12 RNA polymerase II, TATA box binding protein (TBP)-associated factor        | GO:0004402                            |
| TAF1L  | TAF1 RNA polymerase II, TATA box binding protein (TBP)-associated factor, -like  | GO:0004402                            |
| TAF5   | TAF5 RNA polymerase II, TATA box binding protein (TBP)-associated factor         | GO:0004402                            |
| TAF5L  | TAF5-like RNA polymerase II, p300/CBP-associated factor (PCAF)-associated factor | GO:0004402                            |
| TAF6L  | TAF6-like RNA polymerase II, p300/CBP-associated factor (PCAF)-associated factor | GO:0004402                            |
| TAF9   | TAF9 RNA polymerase II, TATA box binding protein (TBP)-associated factor         | GO:0004402                            |
| USP22  | ubiquitin specific peptidase 22                                                  | GO:0010485                            |

---

**Histone deacetylation**

---

|         |                                                                                         |                                                                              |
|---------|-----------------------------------------------------------------------------------------|------------------------------------------------------------------------------|
| APPL1   | adaptor protein, phosphotyrosine interaction, PH domain and leucine zipper containing 1 | GO:0016581                                                                   |
| APPL2   | adaptor protein, phosphotyrosine interaction, PH domain and leucine zipper containing 2 | GO:0016581                                                                   |
| CBX5    | chromobox homolog 5                                                                     | GO:0000118                                                                   |
| CHD3    | chromodomain helicase DNA binding protein 3                                             | GO:0016581                                                                   |
| CHD4    | chromodomain helicase DNA binding protein 4                                             | GO:0016581                                                                   |
| CIR1    | corepressor interacting with RBPJ, 1                                                    | GO:0000118                                                                   |
| CSNK2A1 | casein kinase 2, alpha 1 polypeptide                                                    | GO:0016581,                                                                  |
| GATAD2A | GATA zinc finger domain containing 2A                                                   | GO:0016581, GO:0006306                                                       |
| HDAC1   | histone deacetylase 1                                                                   | GO:0004407, GO:0046969,<br>GO:0032041, GO:0046970,<br>GO:0016581,            |
| HDAC2   | histone deacetylase 2                                                                   | GO:0004407, GO:0046969,<br>GO:0032041, GO:0046970,<br>GO:0016581, GO:0035098 |
| HDAC3   | histone deacetylase 3                                                                   | GO:0004407, GO:0046969,<br>GO:0032041, GO:0046970                            |
| HDAC4   | histone deacetylase 4                                                                   | GO:0004407, GO:0046969,<br>GO:0032041, GO:0046970                            |
| HDAC5   | histone deacetylase 5                                                                   | GO:0004407, GO:0046969,<br>GO:0032041, GO:0046970                            |
| HDAC6   | histone deacetylase 6                                                                   | GO:0004407, GO:0046969,<br>GO:0032041, GO:0046970                            |
| HDAC7   | histone deacetylase 7                                                                   | GO:0046969, GO:0032041,<br>GO:0046970                                        |
| HDAC8   | histone deacetylase 8                                                                   | GO:0004407, GO:0046969,<br>GO:0032041, GO:0046970                            |
| HDAC9   | histone deacetylase 9                                                                   | GO:0004407, GO:0046969,<br>GO:0032041, GO:0046970                            |
| HDAC10  | histone deacetylase 10                                                                  | GO:0004407, GO:0046969,<br>GO:0032041, GO:0046970                            |
| HDAC11  | histone deacetylase 11                                                                  | GO:0004407, GO:0046969,<br>GO:0032041, GO:0046970                            |
| HR      | hairless homolog                                                                        | GO:0000118                                                                   |
| MECOM   | MDS1 and EVI1 complex locus                                                             | GO:0000118                                                                   |
| MTA1    | metastasis associated 1                                                                 | GO:0016581                                                                   |
| MTA2    | metastasis associated 1 family, member 2                                                | GO:0004407, GO:0016581,<br>GO:0000118                                        |
| NCOR1   | nuclear receptor corepressor 1                                                          | GO:0000118,                                                                  |
| NCOR2   | nuclear receptor corepressor 2                                                          | GO:0000118                                                                   |
| NRIP1   | nuclear receptor interacting protein 1                                                  | GO:0000118                                                                   |
| PHF21A  | PHD finger protein 21A                                                                  | GO:0000118                                                                   |
| RBBP4   | retinoblastoma binding protein 4                                                        | GO:0016581, GO:0035098,<br>GO:0016589, GO:0033186                            |
| RBBP7   | retinoblastoma binding protein 7                                                        | GO:0016581, GO:0035098                                                       |
| RERE    | arginine-glutamic acid dipeptide (RE) repeats                                           | GO:0000118                                                                   |
| SALL1   | sal-like 1                                                                              | GO:0004407, GO:0016581                                                       |
| SALL2   | sal-like 2                                                                              | GO:0016581                                                                   |
| SAP18   | Sin3A-associated protein                                                                | GO:0000118                                                                   |
| SAP30   | Sin3A-associated protein                                                                | GO:0000118                                                                   |
| SATB2   | SATB homeobox 2                                                                         | GO:0000118                                                                   |
| SIRT1   | sirtuin 1                                                                               | GO:0004407, GO:0017136,<br>GO:0046969                                        |
| SIRT2   | sirtuin 2                                                                               | GO:0017136                                                                   |
| SIRT6   | sirtuin 6                                                                               | GO:0017136, GO:0046969                                                       |

|                            |                                                     |                         |
|----------------------------|-----------------------------------------------------|-------------------------|
| TAL1                       | T-cell acute lymphocytic leukemia 1                 | GO:0000118              |
| TBL1X                      | transducin (beta)-like 1X-linked                    | GO:0000118              |
| TBL1XR1                    | transducin (beta)-like 1 X-linked receptor 1        | GO:0000118              |
| ZNF217                     | zinc finger protein 217                             | GO:0000118              |
| <b>Histone methylation</b> |                                                     |                         |
| ASH1L                      | ash1 (absent, small, or homeotic)-like              | GO:0018024              |
| ASH2L                      | ash2 (absent, small, or homeotic)-like              | GO:0042800              |
| CARM1<br>(PRMT4)           | coactivator-associated arginine methyltransferase 1 | GO:0035642, GO:0042054  |
| CXXC1                      | CXXC finger protein 1                               | GO:0042800              |
| DOT1L                      | DOT1-like, histone H3 methyltransferase             | GO:0018024              |
| EED                        | embryonic ectoderm development                      | GO:0042054, GO:0035098, |
| EHMT1                      | euchromatic histone-lysine N-methyltransferase 1    | GO:0046976, GO:0046974, |
|                            |                                                     | GO:0018024, GO:0006306  |
| EHMT2                      | euchromatic histone-lysine N-methyltransferase 2    | GO:0018024 ,            |
|                            |                                                     | GO:0046974 ,            |
|                            |                                                     | GO:0046976, GO:0006306  |
| EZH1                       | enhancer of zeste homolog 1                         | GO:0046976 ,GO:0035098  |
| EZH2                       | enhancer of zeste homolog 2                         | GO:0042054, GO:0018024, |
|                            |                                                     | GO:0035098              |
| FBXO11                     | F-box protein 11                                    | [2]                     |
| MEN1                       | multiple endocrine neoplasia I                      | GO:0018024              |
| MLL                        | myeloid/lymphoid or mixed-lineage leukemia          | GO:0042800              |
| MLL2                       | myeloid/lymphoid or mixed-lineage leukemia 2        | GO:0018024              |
| MLL3                       | myeloid/lymphoid or mixed-lineage leukemia 3        | GO:0042800              |
| MLL4                       | myeloid/lymphoid or mixed-lineage leukemia 2        | GO:0042800              |
| MLL5                       | myeloid/lymphoid or mixed-lineage leukemia 5        | GO:0042800, GO:0006306  |
| NSD1                       | nuclear receptor binding SET domain protein 1       | GO:0042799, GO:0042054, |
|                            |                                                     | GO:0046975              |
| PRDM1                      | PR domain containing 1, with ZNF domain             | [18]                    |
| PRDM10                     | PR domain containing 10                             | [18]                    |
| PRDM11                     | PR domain containing 11                             | [18]                    |
| PRDM12                     | PR domain containing 12                             | [18]                    |
| PRDM13                     | PR domain containing 13                             | [18]                    |
| PRDM14                     | PR domain containing 14                             | [18]                    |
| PRDM15                     | PR domain containing 15                             | [18]                    |
| PRDM16                     | PR domain containing 16                             | [18]                    |
| PRDM2                      | PR domain containing 2, with ZNF domain             | GO:0018024              |
| PRDM4                      | PR domain containing 4                              | [18]                    |
| PRDM5                      | PR domain containing 5                              | [18]                    |
| PRDM6                      | PR domain containing 6                              | GO:0018024              |
| PRDM7                      | PR domain containing 7                              | GO:0042800              |
| PRDM8                      | PR domain containing 8                              | [18]                    |
| PRDM9                      | PR domain containing 9                              | GO:0018024              |
| PRMT1                      | protein arginine methyltransferase 1                | GO:0042054, GO:0044020  |
| PRMT2                      | protein arginine methyltransferase 2                | GO:0008469, GO:0042054  |
| PRMT3                      | protein arginine methyltransferase 3                | [2]                     |
| PRMT5                      | protein arginine methyltransferase 5                | GO:0008469              |
| PRMT6                      | protein arginine methyltransferase 6                | GO:0042054, GO:0044020, |
|                            |                                                     | GO:0070612, GO:0070611  |
| PRMT7                      | protein arginine methyltransferase 7                | GO:0008469, GO:0044020  |
| PRMT8                      | protein arginine methyltransferase 8                | GO:0008469              |
| RBBP5                      | retinoblastoma binding protein 5                    | GO:0042800              |
| SETD1A                     | SET domain containing 1A                            | GO:0042800, GO:0018024  |
| SETD1B                     | SET domain containing 1B                            | GO:0042800              |

|          |                                                    |                                    |
|----------|----------------------------------------------------|------------------------------------|
| SETD2    | SET domain containing 2                            | GO:0018024                         |
| SETD3    | SET domain containing 3                            | GO:0046975                         |
| SETD7    | SET domain containing (lysine methyltransferase) 7 | GO:0018024                         |
| SETD8    | SET domain containing (lysine methyltransferase) 8 | GO:0018024                         |
| SETDB1   | SET domain, bifurcated 1                           | GO:0018024                         |
| SETDB2   | SET domain, bifurcated 2                           | GO:0046974                         |
| SETMAR   | SET domain and mariner transposase fusion gene     | GO:0018024                         |
| SMYD2    | SET and MYND domain containing 2                   | GO:0046975                         |
| SMYD3    | SET and MYND domain containing 3                   | GO:0018024                         |
| SUV39H1  | suppressor of variegation 3-9 homolog 1            | GO:0042054, GO:0046974, GO:0018024 |
| SUV39H2  | suppressor of variegation 3-9 homolog 2            | GO:0046974, GO:0018024             |
| SUV420H1 | suppressor of variegation 4-20 homolog 1           | GO:0042799, GO:0018024             |
| SUV420H2 | suppressor of variegation 4-20 homolog 2           | GO:0042799                         |
| SUZ12    | suppressor of zeste 12 homolog                     | GO:0042054, GO:0035098             |
| WDR5     | WD repeat domain 5                                 | GO:0042800                         |
| WDR82    | WD repeat domain 82                                | GO:0042800                         |
| WHSC1    | Wolf-Hirschhorn syndrome candidate 1               | GO:0018024                         |
| WHSC1L1  | Wolf-Hirschhorn syndrome candidate 1-like 1        | GO:0018024                         |

#### Histone demethylation

|           |                                                             |                                                            |
|-----------|-------------------------------------------------------------|------------------------------------------------------------|
| C14orf169 | chromosome 14 open reading frame 169                        | GO:0032453, GO:0051864                                     |
| JHDM1D    | jumonji C domain containing histone demethylase 1 homolog D | GO:0032454, GO:0035575, GO:0051864, GO:0071558             |
| JMJD6     | jumonji domain containing 6                                 | GO:0033746, GO:0033749                                     |
| KDM1A     | lysine (K)-specific demethylase 1A                          | GO:0032452, GO:0032453, GO:0032454, GO:0034648             |
| KDM1B     | lysine (K)-specific demethylase 1B                          | GO:0034648, GO:0034649                                     |
| KDM2A     | lysine (K)-specific demethylase 2A                          | GO:0051864                                                 |
| KDM2B     | lysine (K)-specific demethylase 2B                          | GO:0032452, GO:0051864, [18]                               |
| KDM3A     | lysine (K)-specific demethylase 3A                          | GO:0051864                                                 |
| KDM4A     | lysine (K)-specific demethylase 4A                          | GO:0032454                                                 |
| KDM4C     | lysine (K)-specific demethylase 4C                          | GO:0034647, GO:0034648                                     |
| KDM5B     | lysine (K)-specific demethylase 5B                          | GO:0032453                                                 |
| KDM5C     | lysine (K)-specific demethylase 5C                          | GO:0032453                                                 |
| KDM5D     | lysine (K)-specific demethylase 5D                          | GO:0032453                                                 |
| KDM8      | lysine (K)-specific demethylase 8                           | GO:0051864                                                 |
| PADI4     | peptidyl arginine deiminase, type IV                        | [18]                                                       |
| PHF2      | PHD finger protein 2                                        | GO:0032454                                                 |
| PHF8      | PHD finger protein 8                                        | GO:0032452, GO:0032454, GO:0035575, GO:0051864, GO:0071558 |

#### Chromatin remodeling

|          |                                                |                        |
|----------|------------------------------------------------|------------------------|
| ACTL6A   | Actin-like 6A                                  | GO:0016514, GO:0031011 |
| ACTL6B   | Actin-like 6B                                  | GO:0016514             |
| ACTR5    | ARP5 actin-related protein 5 homolog           | GO:0031011             |
| ACTR8    | ARP8 actin-related protein 8 homolog           | GO:0031011             |
| AEBP2    | AE binding protein 2                           | GO:0035098,            |
| ARID1A   | AT rich interactive domain 1A (SWI-like)       | GO:0016514             |
| ARID1B   | AT rich interactive domain 1B (SWI1-like)      | GO:0016514             |
| ASF1A    | ASF1 anti-silencing function 1 homolog A       | GO:0016585             |
| BAZ1B    | bromodomain adjacent to zinc finger domain, 1B | GO:0043044, GO:0016585 |
| BMI1     | BMI1 polycomb ring finger oncogene             | GO:0035102             |
| BPTF     | bromodomain PHD finger transcription factor    | GO:0016589             |
| C17orf49 | chromosome 17 open reading frame 49            | GO:0016589             |
| CBX1     | chromobox homolog 1                            | [13]                   |

|         |                                                                                                   |                                    |
|---------|---------------------------------------------------------------------------------------------------|------------------------------------|
| CBX2    | chromobox homolog 2                                                                               | GO:0035102                         |
| CBX4    | chromobox homolog 4                                                                               | GO:0035102                         |
| CBX7    | chromobox homolog 7                                                                               | GO:0035102                         |
| CBX8    | chromobox homolog 8                                                                               | GO:0035102                         |
| CHAF1A  | chromatin assembly factor 1, subunit A (p150)                                                     | GO:0033186                         |
| CHAF1B  | chromatin assembly factor 1, subunit B (p60)                                                      | GO:0033186                         |
| CHD1    | chromodomain helicase DNA binding protein 1                                                       | [23]                               |
| CHD2    | chromodomain helicase DNA binding protein 2                                                       | [23]                               |
| CHD5    | chromodomain helicase DNA binding protein 5                                                       | [23]                               |
| CHD6    | chromodomain helicase DNA binding protein 6                                                       | [23]                               |
| CHD7    | chromodomain helicase DNA binding protein 7                                                       | [23]                               |
| CHD8    | chromodomain helicase DNA binding protein 8                                                       | GO:0043044                         |
| CHD9    | chromodomain helicase DNA binding protein 9                                                       | [23]                               |
| HMGXB4  | HMG box domain containing 4                                                                       | GO:0016589                         |
| INO80   | INO80 homolog                                                                                     | GO:0031011                         |
| INO80B  | INO80 complex subunit B                                                                           | GO:0031011                         |
| INO80C  | INO80 complex subunit C                                                                           | GO:0031011                         |
| INO80E  | INO80 complex subunit E                                                                           | GO:0031011                         |
| JARID2  | jumonji, AT rich interactive domain 2                                                             | GO:0035098                         |
| KIF11   | kinesin family member 11                                                                          | GO:0016585                         |
| MAEL    | maelstrom homolog                                                                                 | GO:0016585                         |
| MCRS1   | microspherule protein 1                                                                           | GO:0031011                         |
| MYSM1   | Myb-like, SWIRM and MPN domains 1                                                                 | GO:0016585                         |
| NCR1    | natural cytotoxicity triggering receptor 1                                                        | GO:0016514                         |
| NFRKB   | nuclear factor related to kappaB binding protein                                                  | GO:0031011                         |
| PCGF2   | polycomb group ring finger 2                                                                      | GO:0035102                         |
| PCGF6   | polycomb group ring finger 6                                                                      | GO:0035102                         |
| PHC1    | polyhomeotic homolog 1                                                                            | GO:0035102                         |
| PHC2    | polyhomeotic homolog 2                                                                            | GO:0035102                         |
| PHC3    | polyhomeotic homolog 3                                                                            | GO:0035102                         |
| PHF1    | PHD finger protein 1                                                                              | [5]                                |
| RB1     | retinoblastoma 1                                                                                  | GO:0016514                         |
| RBM10   | RNA binding motif protein 10                                                                      | GO:0016585                         |
| RING1   | ring finger protein 1                                                                             | GO:0035102                         |
| RNF2    | ring finger protein 2                                                                             | GO:0035102                         |
| RSF1    | remodeling and spacing factor 1                                                                   | GO:0031213                         |
| RUVBL1  | RuvB-like 1                                                                                       | GO:0031011                         |
| RUVBL2  | RuvB-like 2                                                                                       | GO:0031011                         |
| SMARCA1 | SWI/SNF related, matrix associated, actin dependent regulator of chromatin, subfamily a, member 1 | GO:0016589, GO:0043044             |
| SMARCA2 | SWI/SNF related, matrix associated, actin dependent regulator of chromatin, subfamily a, member 2 | GO:0016514                         |
| SMARCA4 | SWI/SNF related, matrix associated, actin dependent regulator of chromatin, subfamily a, member 4 | GO:0016514                         |
| SMARCA5 | SWI/SNF related, matrix associated, actin dependent regulator of chromatin, subfamily a, member 5 | GO:0016589, GO:0031213, GO:0043044 |
| SMARCB1 | SWI/SNF related, matrix associated, actin dependent regulator of chromatin, subfamily b, member 1 | GO:0016514                         |
| SMARCC1 | SWI/SNF related, matrix associated, actin dependent regulator of chromatin, subfamily c, member 1 | GO:0016514                         |
| SMARCC2 | SWI/SNF related, matrix associated, actin dependent regulator of chromatin, subfamily c, member 2 | GO:0016514                         |
| SMARCD1 | SWI/SNF related, matrix associated, actin dependent regulator of chromatin, subfamily d, member 1 | GO:0016514, GO:0016585             |
| SMARCD2 | SWI/SNF related, matrix associated, actin dependent regulator of chromatin, subfamily d, member 2 | GO:0016514                         |



---

|         |                                                                                                   |            |
|---------|---------------------------------------------------------------------------------------------------|------------|
| SMARCD3 | SWI/SNF related, matrix associated, actin dependent regulator of chromatin, subfamily d, member 3 | GO:0016514 |
| SMARCE1 | SWI/SNF related, matrix associated, actin dependent regulator of chromatin, subfamily e, member 1 | GO:0016514 |
| SOX9    | SRY (sex determining region Y)-box 9                                                              | GO:0016585 |
| TFPT    | TCF3 (E2A) fusion partner                                                                         | GO:0031011 |
| UCHL5   | ubiquitin carboxyl-terminal hydrolase L5                                                          | GO:0031011 |
| YY1     | YY1 transcription factor                                                                          | GO:0031011 |

---

**Table 2: GO terms and corresponding IDs of human epigenetic genes**

| Type                 | GO Term                            | GO ID                                                                                                                                          |
|----------------------|------------------------------------|------------------------------------------------------------------------------------------------------------------------------------------------|
| DNA methylation      | DNA-methyltransferase activity     | GO:0009008, GO:0003886, GO:0051718                                                                                                             |
|                      | methyl-CpG binding                 | GO:0008327                                                                                                                                     |
|                      | DNA methylation                    | GO:0006306                                                                                                                                     |
|                      | DNA demethylation                  | GO:0080111                                                                                                                                     |
| Histone modification | histone acetyltransferase activity | GO:0010484, GO:0010485, GO:0004402                                                                                                             |
|                      | histone acetyltransferase complex  | GO:0000123                                                                                                                                     |
|                      | histone deacetylase activity       | GO:0017136, GO:0032041, GO:0046969, GO:0046970, GO:0043997                                                                                     |
|                      | histone deacetylase complex        | GO:0000118                                                                                                                                     |
|                      | histone methyltransferase activity | GO:0008469, GO:0018024, GO:0035642, GO:0042054, GO:0042799, GO:0042800, GO:0044020, GO:0046974, GO:0046975, GO:0046976, GO:0070611, GO:0070612 |
|                      | histone demethylase activity       | GO:0004407, GO:0032452, GO:0034648, GO:0071558, GO:0051864, GO:0032453, GO:0032454, GO:0034649, GO:0033746, GO:0034647, GO:0035575, GO:0033749 |
| chromatin remodeling | chromatin remodeling               | GO:0043044, GO:0016585                                                                                                                         |
|                      | NuRD complex                       | GO:0016581                                                                                                                                     |
|                      | SWI/SNF complex                    | GO:0016514                                                                                                                                     |
|                      | NURF complex                       | GO:0016589                                                                                                                                     |
|                      | Ino80 complex                      | GO:0031011                                                                                                                                     |
|                      | RSF complex                        | GO:0031213                                                                                                                                     |
|                      | CAF-1 complex                      | GO:0033186                                                                                                                                     |
|                      | PRC1 complex                       | GO:0035102                                                                                                                                     |
| PRC2 complex         | GO:0035098                         |                                                                                                                                                |

\* Results from GeneOntology in February 2012

**Table 3. Function descriptions of 12 DD genes and 16 UU genes**

| Symbol    | Function described in UniProt Knowledgebase                                                                                                  | Tumor-related function                                                                                                                                                                       |
|-----------|----------------------------------------------------------------------------------------------------------------------------------------------|----------------------------------------------------------------------------------------------------------------------------------------------------------------------------------------------|
| C14orf169 | Histone demethylase that specifically demethylates 'Lys-4' (H3K4me) and 'Lys-36' (H3K36me) of histone H3.                                    | Induction of C14orf169 into NIH3T3 cells conferred growth-promoting activity, while suppression of its expression suppressed growth of cancer cells [29].                                    |
| PRMT7     | Arginine methyltransferase that can both catalyze the formation of omega-N monomethylarginine (MMA) and symmetrical dimethylarginine (sDMA). | Downregulation of PRMT7 was associated with an increased sensitivity of HeLa cells to camptothecin and an increase in apoptosis [31].                                                        |
| PRMT3     | Methylates (mono and asymmetric dimethylation) the guanidino nitrogens of arginyl residues in some proteins.                                 | N/A                                                                                                                                                                                          |
| RUVBL1    | Possesses single-stranded DNA-stimulated ATPase and ATP-dependent DNA helicase (3' to 5') activity.                                          | Expression of RUVBL1 increased in liver cancer, and depletion of its expression in liver cancer cells led to growth arrest [11].                                                             |
| CBX4      | E3 SUMO-protein ligase which facilitates SUMO1 conjugation by UBE2I                                                                          | N/A                                                                                                                                                                                          |
| CHD7      | Probable transcription regulator                                                                                                             | Depletion of CHD7 reduced protein synthesis and cell proliferation [36].                                                                                                                     |
| DNMT1     | Methylates CpG residues. Preferentially methylates hemimethylated DNA.                                                                       | Causing silence of tumor-suppressor genes in cancer cells [24]. Reduced Dnmt1 expression can inhibit tumor formation in a mouse model [32].                                                  |
| PRMT5     | Arginine methyltransferase that can both catalyze the formation of omega-N monomethylarginine (MMA) and symmetrical dimethylarginine (sDMA). | Expression of PRMT5 is elevated in gastric cancer and lymphoma [14,21]. PRMT5 regulates cell growth and proliferation by controlling expression of genes involved in tumor suppression [22]. |
| UCHL5     | Protease that specifically cleaves 'Lys-48'-linked polyubiquitin chains.                                                                     | UCHL5 up-regulate of TGF- $\beta$ signaling [32] and its expression increases in cervical carcinoma [25]. b-AP15 inhibited the activity of UCHL5 and induced apoptosis of cancer cells [8].  |

|         |                                                                                                                                                                                                                            |                                                                                                                                                                     |
|---------|----------------------------------------------------------------------------------------------------------------------------------------------------------------------------------------------------------------------------|---------------------------------------------------------------------------------------------------------------------------------------------------------------------|
| CHD1    | ATP-dependent chromatin-remodeling factor which functions as substrate recognition component of the transcription regulatory histone acetylation (HAT) complex SAGA.                                                       | Expression of CHD1 reduced in tumors, and depletion of this gene promoted cell invasiveness [12].                                                                   |
| PRMT1   | Arginine methyltransferase that methylates (mono and asymmetric dimethylation) the guanidino nitrogens of arginyl residues.                                                                                                | PRMT1 expression increased in cancer cells of various tissues and Abrogation of the depletion of this gene suppressed growth of bladder and lung cancer cells [35]. |
| MTA1    | May be involved in the regulation of gene expression by covalent modification of histone proteins.                                                                                                                         | Forced expression of this gene causes inappropriate mammary gland development and tumorigenesis [1].                                                                |
| NCOR2   | Transcriptional corepressor of NR4A2/NURR1 and acts through histone deacetylases (HDACs) to keep promoters of NR4A2/NURR1 target genes in a repressed deacetylated state.                                                  | NCOR2 was silenced in non-Hodgkin lymphoma, and <i>In vitro</i> down-regulation of SMRT induces transformed phenotype to immortalized fibroblasts [28].             |
| KDM4C   | Histone demethylase that specifically demethylates 'Lys-9' and 'Lys-36' residues of histone H3.                                                                                                                            | KDM4C was amplified in various tumors and inhibiting the expression of this gene inhibited cell proliferation[7].                                                   |
| FTO     | Dioxygenase that repairs alkylated DNA and RNA by oxidative demethylation.                                                                                                                                                 | N/A                                                                                                                                                                 |
| KAT5    | Catalytic subunit of the NuA4 histone acetyltransferase complex which is involved in transcriptional activation of select genes principally by acetylation of nucleosomal histones H4 and H2A.                             | KAT5 counteracts Myc-induced lymphomagenesis and LOH of this gene is a frequent event in lymphomas and mammary carcinomas [10].                                     |
| BPTF    | Histone-binding component of NURF (nucleosome-remodeling factor), a complex which catalyzes ATP-dependent nucleosome sliding and facilitates transcription of chromatin.                                                   | The BPTF chromosomal region was amplified in various tumors depletion of BPTF inhibited cell proliferation [3].                                                     |
| NCOA2   | Transcriptional coactivator for steroid receptors and nuclear receptors.                                                                                                                                                   | deletion of NCOA2 in mice predisposes to diethylnitrosamine-induced liver tumorigenesis [19].                                                                       |
| PHF15   | Component of the HBO1 complex which has a histone H4-specific acetyltransferase activity.                                                                                                                                  | N/A                                                                                                                                                                 |
| SMARCA1 | Energy-transducing component of NURF (nucleosome-remodeling factor) and CERF (CECR2-containing-remodeling factor) complexes. Both complexes facilitate the perturbation of chromatin structure in an ATP-dependent manner. | Inhibition of SMARCA1 expression cause growth-arrest and death of cancer cells [34].                                                                                |

|        |                                                                                                                                                                                                   |                                                                                                                                                         |
|--------|---------------------------------------------------------------------------------------------------------------------------------------------------------------------------------------------------|---------------------------------------------------------------------------------------------------------------------------------------------------------|
| BMI1   | Component of a Polycomb group (PcG) multiprotein PRC1-like complex, a complex class required to maintain the transcriptionally repressive state of many genes.                                    | The Bmi-1 is elevated in many types of cancers, and depletion of this genes causes apoptosis and/or senescence in tumor cells [4].                      |
| MGEA5  | Possesses hyaluronidase activity. Acetylates 'Lys-8' of histone H4 and 'Lys-14' of histone H3.                                                                                                    | N/A                                                                                                                                                     |
| KDM3A  | Histone demethylase that specifically demethylates 'Lys-9' of histone H3.                                                                                                                         | Expression of KDM3A increase in cancer cells of various tissues [6]. Depletion of this gene is sufficient to reduce tumor growth in vivo [15].          |
| ATF7IP | Recruiter that couples transcriptional factors to general transcription apparatus and thereby modulates transcription regulation and chromatin formation.                                         | ATF7IP is frequently overexpressed in cancers of different tissues, and depletion of this genes results in decreased telomerase activity [17].          |
| HDAC5  | Responsible for the deacetylation of lysine residues on the N-terminal part of the core histones (H2A, H2B, H3 and H4).                                                                           | N/A                                                                                                                                                     |
| KDM4A  | Histone demethylase that specifically demethylates 'Lys-9' and 'Lys-36' residues of histone H3.                                                                                                   | N/A                                                                                                                                                     |
| KDM5B  | Histone demethylase that demethylates 'Lys-4' of histone H3.                                                                                                                                      | KDM5B is overexpressed in breast cancer cells [33] , and may promote tumourigenesis by downregulating expression of genes such as BRCA1 and HOXA5 [26]. |
| ING4   | Component of the HBO1 complex which has a histone H4-specific acetyltransferase activity, a reduced activity toward histone H3 and is responsible for the bulk of histone H4 acetylation in vivo. | ING4 overexpression diminished colony-forming efficiency, induced apoptosis, and inhibited melanoma cell invasion [16,27].                              |

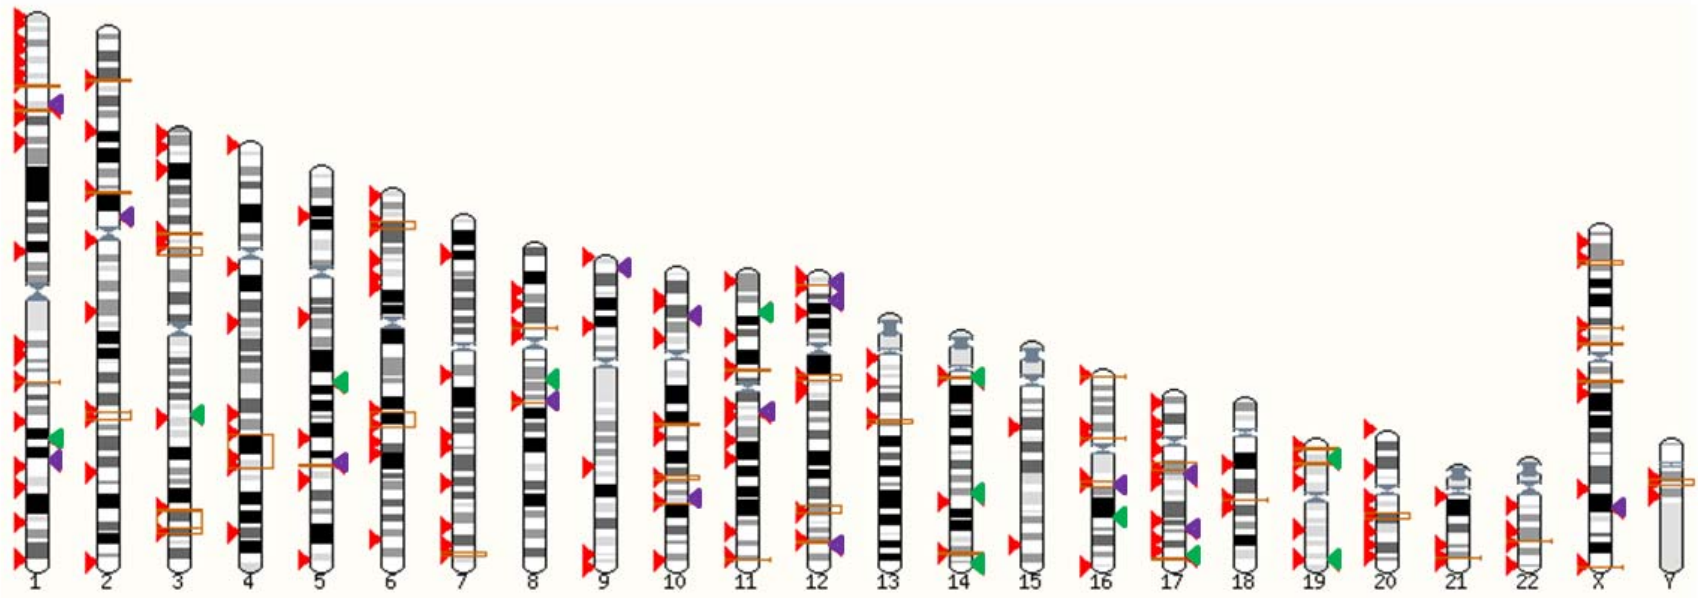

Fig. 1

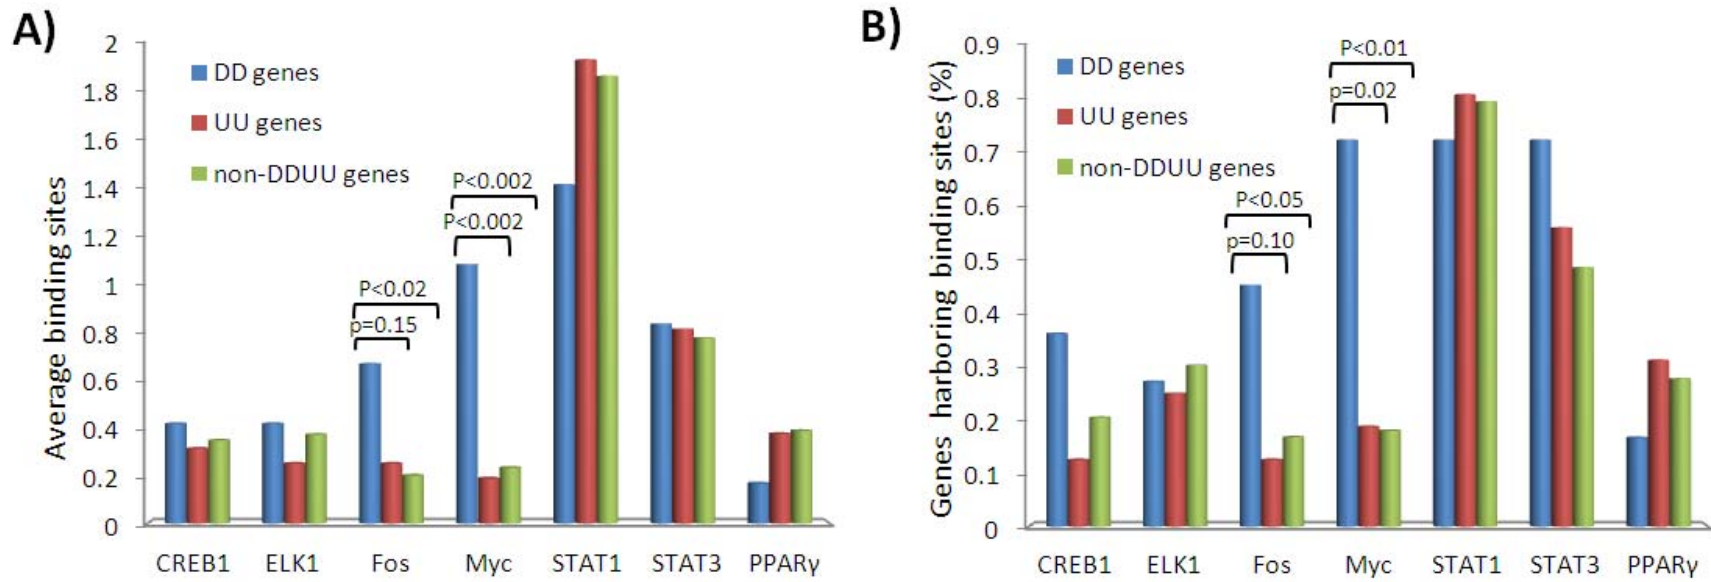

Fig.2

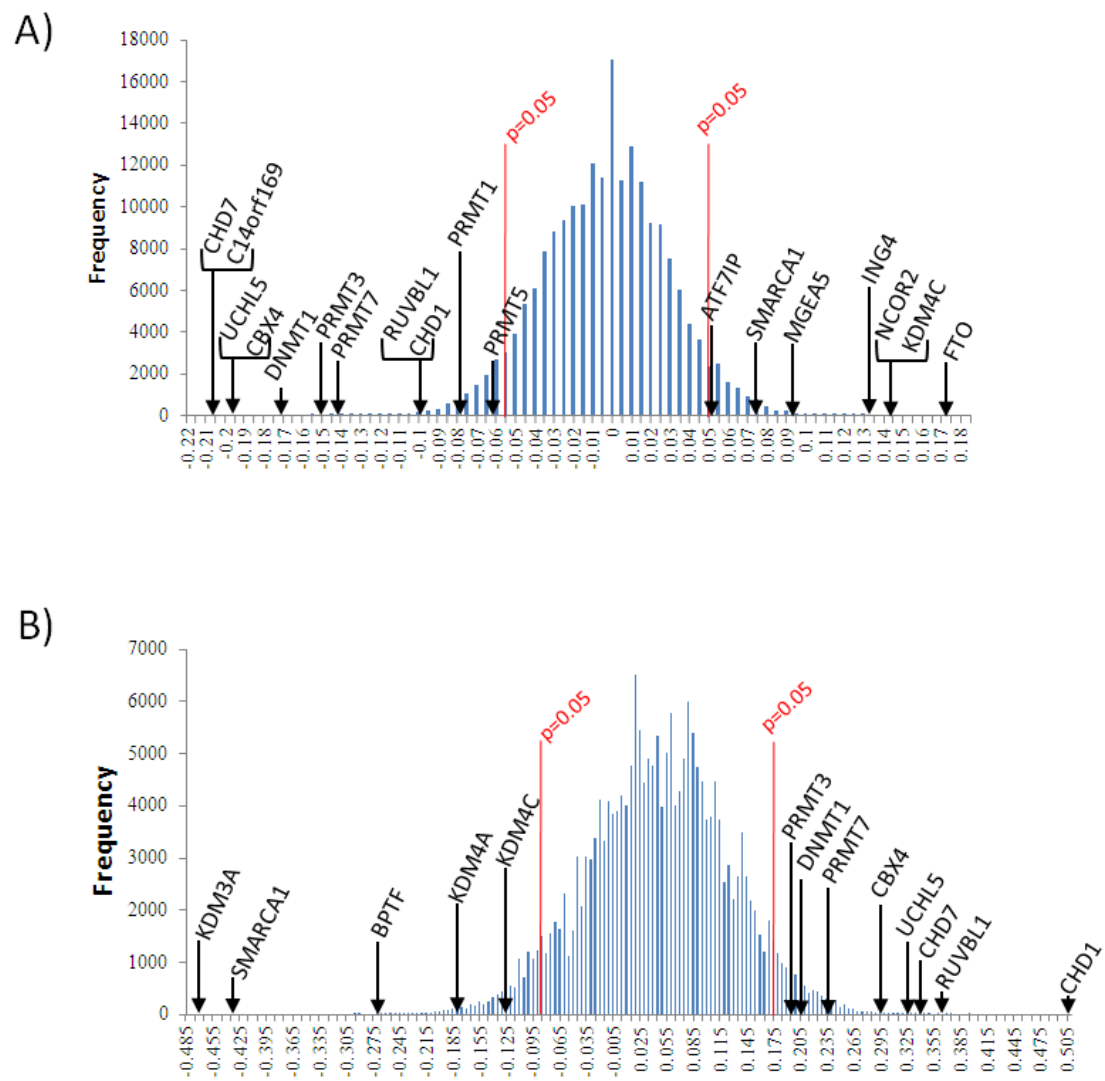

Fig.3



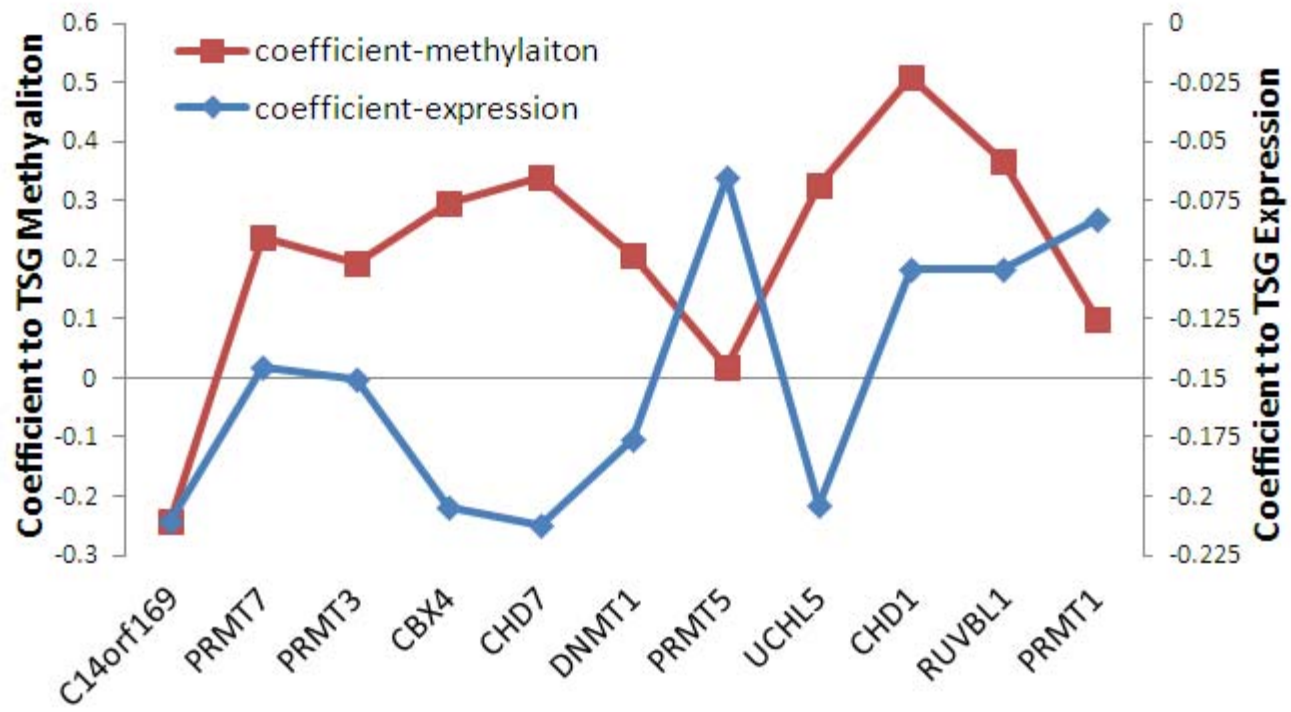

Fig. 4

## Reference List

- [1] R. Bagheri-Yarmand, A.H. Talukder, R.A. Wang et al., Metastasis-associated protein 1 deregulation causes inappropriate mammary gland development and tumorigenesis. *Development*. 131 (2004) 3469-3479.
- [2] M.T. Bedford, S.G. Clarke, Protein arginine methylation in mammals: who, what, and why. *Mol.Cell*. 33 (2009) 1-13.
- [3] Y. Buganim, I. Goldstein, D. Lipson et al., A novel translocation breakpoint within the BPTF gene is associated with a pre-malignant phenotype. *PLoS.One*. 5 (2010) e9657.
- [4] L. Cao, J. Bombard, K. Cintron et al., BMI1 as a novel target for drug discovery in cancer. *J.Cell Biochem*. 112 (2011) 2729-2741.
- [5] R. Cao, H. Wang, J. He et al., Role of hPHF1 in H3K27 methylation and Hox gene silencing. *Mol.Cell Biol*. 28 (2008) 1862-1872.
- [6] H.S. Cho, G. Toyokawa, Y. Daigo et al., The JmjC domain-containing histone demethylase KDM3A is a positive regulator of the G(1)/S transition in cancer cells via transcriptional regulation of the HOXA1 gene. *Int.J.Cancer*. 131 (2012) E179-E189.
- [7] P.A. Cloos, J. Christensen, K. Agger et al., The putative oncogene GASC1 demethylates tri- and dimethylated lysine 9 on histone H3. *Nature*. 442 (2006) 307-311.
- [8] P. D'Arcy, S. Brnjic, M.H. Olofsson et al., Inhibition of proteasome deubiquitinating activity as a new cancer therapy. *Nat.Med*. 17 (2011) 1636-1640.
- [9] P.K. De, R. Barriot, F. Speleman et al., Positional gene enrichment analysis of gene sets for high-resolution identification of overrepresented chromosomal regions. *Nucleic Acids Res*. 36 (2008) e43.
- [10] C. Gorrini, M. Squatrito, C. Luise et al., Tip60 is a haplo-insufficient tumour suppressor required for an oncogene-induced DNA damage response. *Nature*. 448 (2007) 1063-1067.
- [11] V. Haurie, L. Menard, A. Nicou et al., Adenosine triphosphatase pontin is overexpressed in hepatocellular carcinoma and coregulated with reptin through a new posttranslational mechanism. *Hepatology*. 50 (2009) 1871-1883.
- [12] S. Huang, Z.G. Gulzar, K. Salari et al., Recurrent deletion of CHD1 in prostate cancer with relevance to cell invasiveness. *Oncogene*. 2011) 10.
- [13] B. Jin, Y. Li, K.D. Robertson, DNA methylation: superior or subordinate in the epigenetic hierarchy? *Genes Cancer*. 2 (2011) 607-617.

- [14] J.M. Kim, H.Y. Sohn, S.Y. Yoon et al., Identification of gastric cancer-related genes using a cDNA microarray containing novel expressed sequence tags expressed in gastric cancer cells. *Clin.Cancer Res.* 11 (2005) 473-482.
- [15] A.J. Krieg, E.B. Rankin, D. Chan et al., Regulation of the histone demethylase JMJD1A by hypoxia-inducible factor 1 alpha enhances hypoxic gene expression and tumor growth. *Mol.Cell Biol.* 30 (2010) 344-353.
- [16] J. Li, M. Martinka, G. Li, Role of ING4 in human melanoma cell migration, invasion and patient survival. *Carcinogenesis.* 29 (2008) 1373-1379.
- [17] L. Liu, K. Ishihara, T. Ichimura et al., MCAF1/AM is involved in Sp1-mediated maintenance of cancer-associated telomerase activity. *J.Biol.Chem.* 284 (2009) 5165-5174.
- [18] A. Miremadi, M.Z. Oestergaard, P.D. Pharoah et al., Cancer genetics of epigenetic genes. *Hum.Mol.Genet.* 16 Spec No 1:R28-49. (2007) R28-R49.
- [19] K.A. O'Donnell, V.W. Keng, B. York et al., A Sleeping Beauty mutagenesis screen reveals a tumor suppressor role for Ncoa2/Src-2 in liver cancer. *Proc.Natl.Acad.Sci.U.S.A.* 109 (2012) E1377-E1386.
- [20] E.J. Oakley, Z.G. Van, Unraveling the complex regulation of stem cells: implications for aging and cancer. *Leukemia.* 21 (2007) 612-621.
- [21] S. Pal, R.A. Baiocchi, J.C. Byrd et al., Low levels of miR-92b/96 induce PRMT5 translation and H3R8/H4R3 methylation in mantle cell lymphoma. *EMBO J.* 26 (2007) 3558-3569.
- [22] S. Pal, S.N. Vishwanath, H. Erdjument-Bromage et al., Human SWI/SNF-associated PRMT5 methylates histone H3 arginine 8 and negatively regulates expression of ST7 and NM23 tumor suppressor genes. *Mol.Cell Biol.* 24 (2004) 9630-9645.
- [23] A. Portela, Epigenetic modifications and human disease.2010).
- [24] M.F. Robert, S. Morin, N. Beaulieu et al., DNMT1 is required to maintain CpG methylation and aberrant gene silencing in human cancer cells. *Nat.Genet.* 33 (2003) 61-65.
- [25] U. Rolen, V. Kobzeva, N. Gasparjan et al., Activity profiling of deubiquitinating enzymes in cervical carcinoma biopsies and cell lines. *Mol.Carcinog.* 45 (2006) 260-269.
- [26] J. Secombe, L. Li, L. Carlos et al., The Trithorax group protein Lid is a trimethyl histone H3K4 demethylase required for dMyc-induced cell growth. *Genes Dev.* 21 (2007) 537-551.
- [27] M. Shiseki, M. Nagashima, R.M. Pedoux et al., p29ING4 and p28ING5 bind to p53 and p300, and enhance p53 activity. *Cancer Res.* 63 (2003) 2373-2378.

- [28] L. Song, A. Zlobin, P. Ghoshal et al., Alteration of SMRT tumor suppressor function in transformed non-Hodgkin lymphomas. *Cancer Res.* 65 (2005) 4554-4561.
- [29] C. Suzuki, K. Takahashi, S. Hayama et al., Identification of Myc-associated protein with JmjC domain as a novel therapeutic target oncogene for lung cancer. *Mol.Cancer Ther.* 6 (2007) 542-551.
- [30] M. Thomas-Chollier, O. Sand, J.V. Turatsinze et al., RSAT: regulatory sequence analysis tools. *Nucleic Acids Res.* 36 (2008) W119-W127.
- [31] V. Verbiest, D. Montaudon, M.T. Tautu et al., Protein arginine (N)-methyl transferase 7 (PRMT7) as a potential target for the sensitization of tumor cells to camptothecins. *FEBS Lett.* 582 (2008) 1483-1489.
- [32] S.J. Wicks, K. Haros, M. Maillard et al., The deubiquitinating enzyme UCH37 interacts with Smads and regulates TGF-beta signalling. *Oncogene.* 24 (2005) 8080-8084.
- [33] K. Yamane, K. Tateishi, R.J. Klose et al., PLU-1 is an H3K4 demethylase involved in transcriptional repression and breast cancer cell proliferation. *Mol.Cell.* 25 (2007) 801-812.
- [34] Y. Ye, Y. Xiao, W. Wang et al., Inhibition of expression of the chromatin remodeling gene, SNF2L, selectively leads to DNA damage, growth inhibition, and cancer cell death. *Mol.Cancer Res.* 7 (2009) 1984-1999.
- [35] M. Yoshimatsu, G. Toyokawa, S. Hayami et al., Dysregulation of PRMT1 and PRMT6, Type I arginine methyltransferases, is involved in various types of human cancers. *Int.J.Cancer.* 128 (2011) 562-573.
- [36] G.E. Zentner, E.A. Hurd, M.P. Schnetz et al., CHD7 functions in the nucleolus as a positive regulator of ribosomal RNA biogenesis. *Hum.Mol.Genet.* 19 (2010) 3491-3501.
